# Supplementary material
Source: publisher figshare collection journal article supplement (https://acs.figshare.com/ndownloader/files/4583068)
Supplement: Supplementary file 1 [file 4583068]

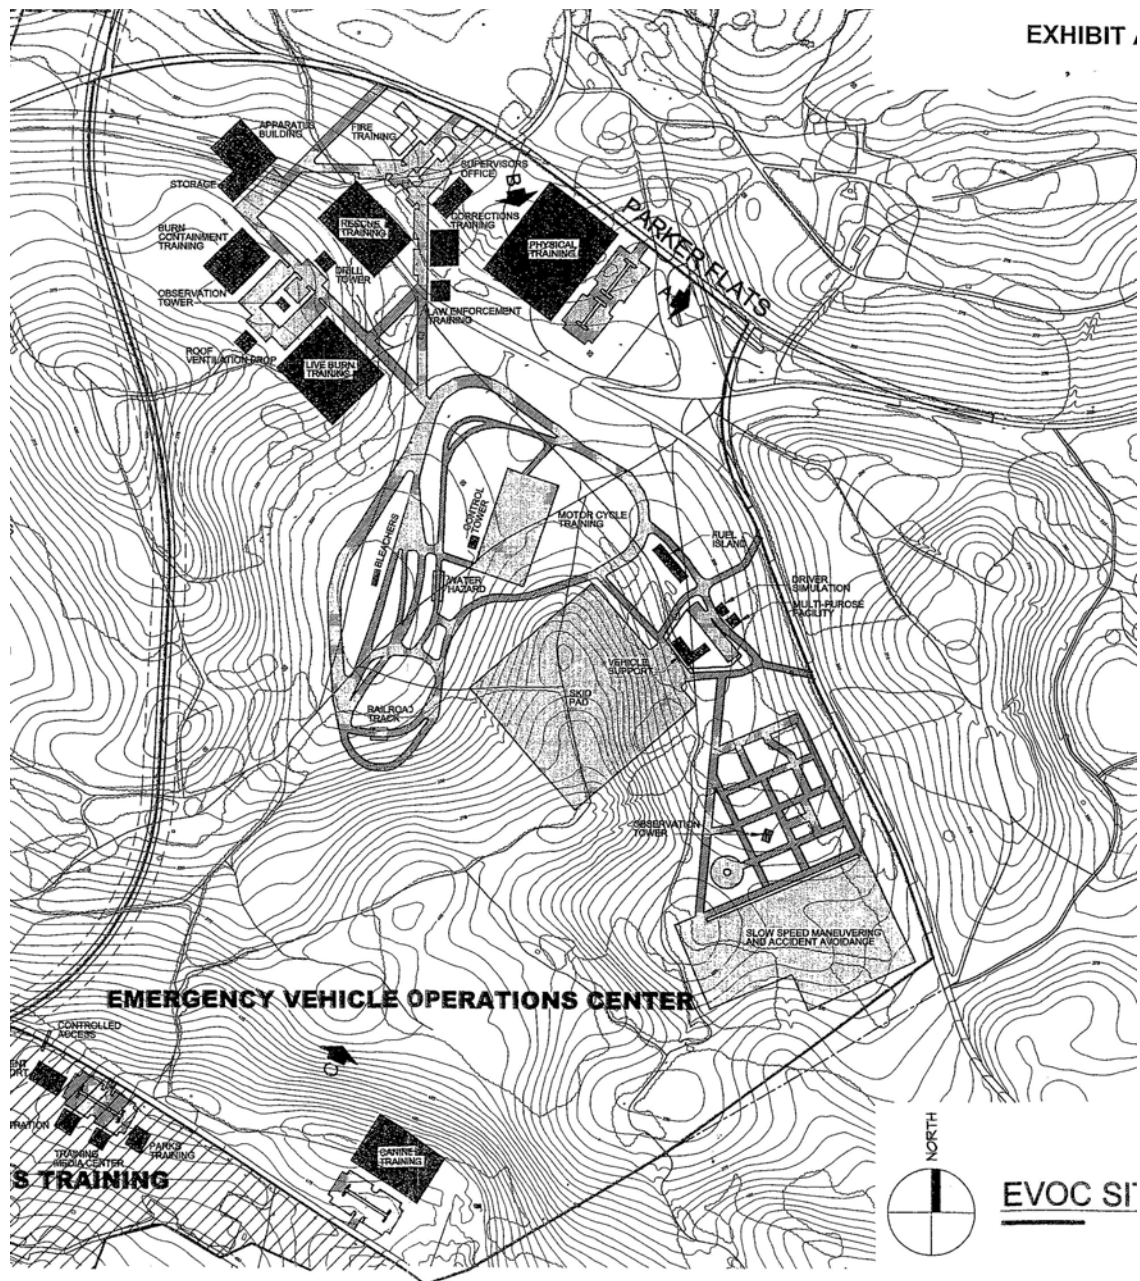

**FIGURE SI 1** Plan for Monterey Peninsula College Emergency Vehicle Operations Center, to be constructed at Fort Ord Site OE-53.

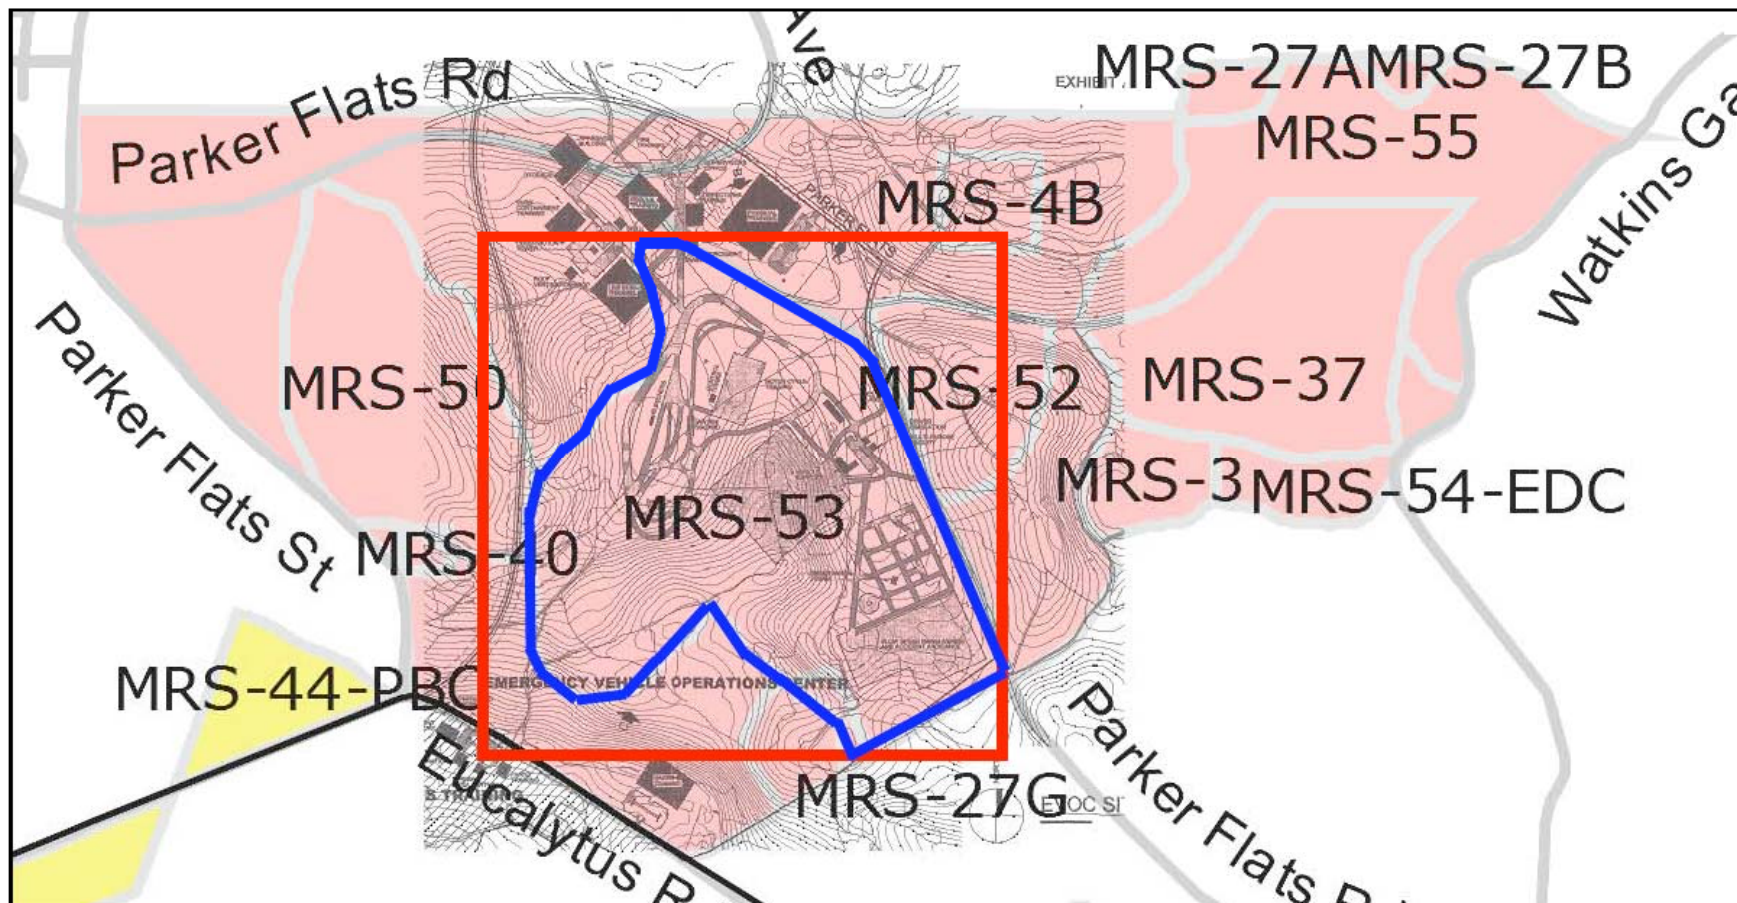

**FIGURE SI 2** Emergency Vehicle Operations Center plan overlain on map of selected munitions response sites (each labeled as “MRS”) at Fort Ord. The case study focuses on elements of the plan within site MRS-53 (i.e., OE-53), shown within the bright blue, irregularly shaped boundary within the larger square. Note that all the major buildings are outside of OE-53 (and other OE sites) but that other, smaller buildings and several vehicle parking, fueling, testing, and maneuver areas are within OE-53. The risk assessment includes all major developments within this blue boundary.
